# Supplementary material
Source: Springer Nature journal article supplement (https://www.springermedizin.de/resource/supplementary/12916_2012_530_MOESM2_ESM.pdf/9598034)

**ONE-STAGE**

| Author (Year)    | n/N    |
|------------------|--------|
| Buchholz (1981)  | 99/640 |
| Raut (1995)      | 6/183  |
| Miley (1982)     | 8/101  |
| Loty (1992)      | 8/90   |
| Schneider (1989) | 19/72  |
| Winkler (2006)   | 3/37   |
| Rudelli (2008)   | 0/32   |
| Ure (1998)       | 0/20   |
| Wagner (1995)    | 4/18   |
| Sofer (2005)     | 1/17   |
| Mulcahy (1996)   | 0/15   |

**TWO-STAGE**

|                        |        |
|------------------------|--------|
| Toulson (2009)         | 11/132 |
| Fitzgerald (1985)      | 11/131 |
| Stockley (2008)        | 9/114  |
| Romano (2010)          | 5/102  |
| Hsieh (2009)           | 8/99   |
| Chen (2009)            | 7/57   |
| Haddad (2000)          | 4/50   |
| Lieberman (1994)       | 8/47   |
| Whittaker (2009)       | 6/43   |
| Colyer (1994)          | 5/41   |
| Fink (2009)            | 0/40   |
| Cabrita (2007a)        | 4/38   |
| Cordero-Ampuero (2009) | 3/36   |
| McKenna (2009)         | 0/31   |
| Cabrita (2007b)        | 10/30  |
| Piriou (2003)          | 3/30   |
| Fehring (1999)         | 1/25   |
| Evans (2004)           | 4/23   |
| Wilson (1989)          | 2/22   |
| Yamamoto (2003)        | 0/17   |
| Cordero-Ampuero (2007) | 1/16   |
| Nelson (1993a)         | 2/12   |
| Magnan (2001)          | 2/10   |
| Nelson (1993b)         | 4/10   |
| Dairaku (2009)         | 1/9    |
| Takahira (2003)        | 1/8    |
| Takigami (2010)        | 0/8    |
| Sudo (2008)            | 1/7    |

**Summary\***

|                  |  |
|------------------|--|
| One-stage        |  |
| Two-stage        |  |
| One or two stage |  |

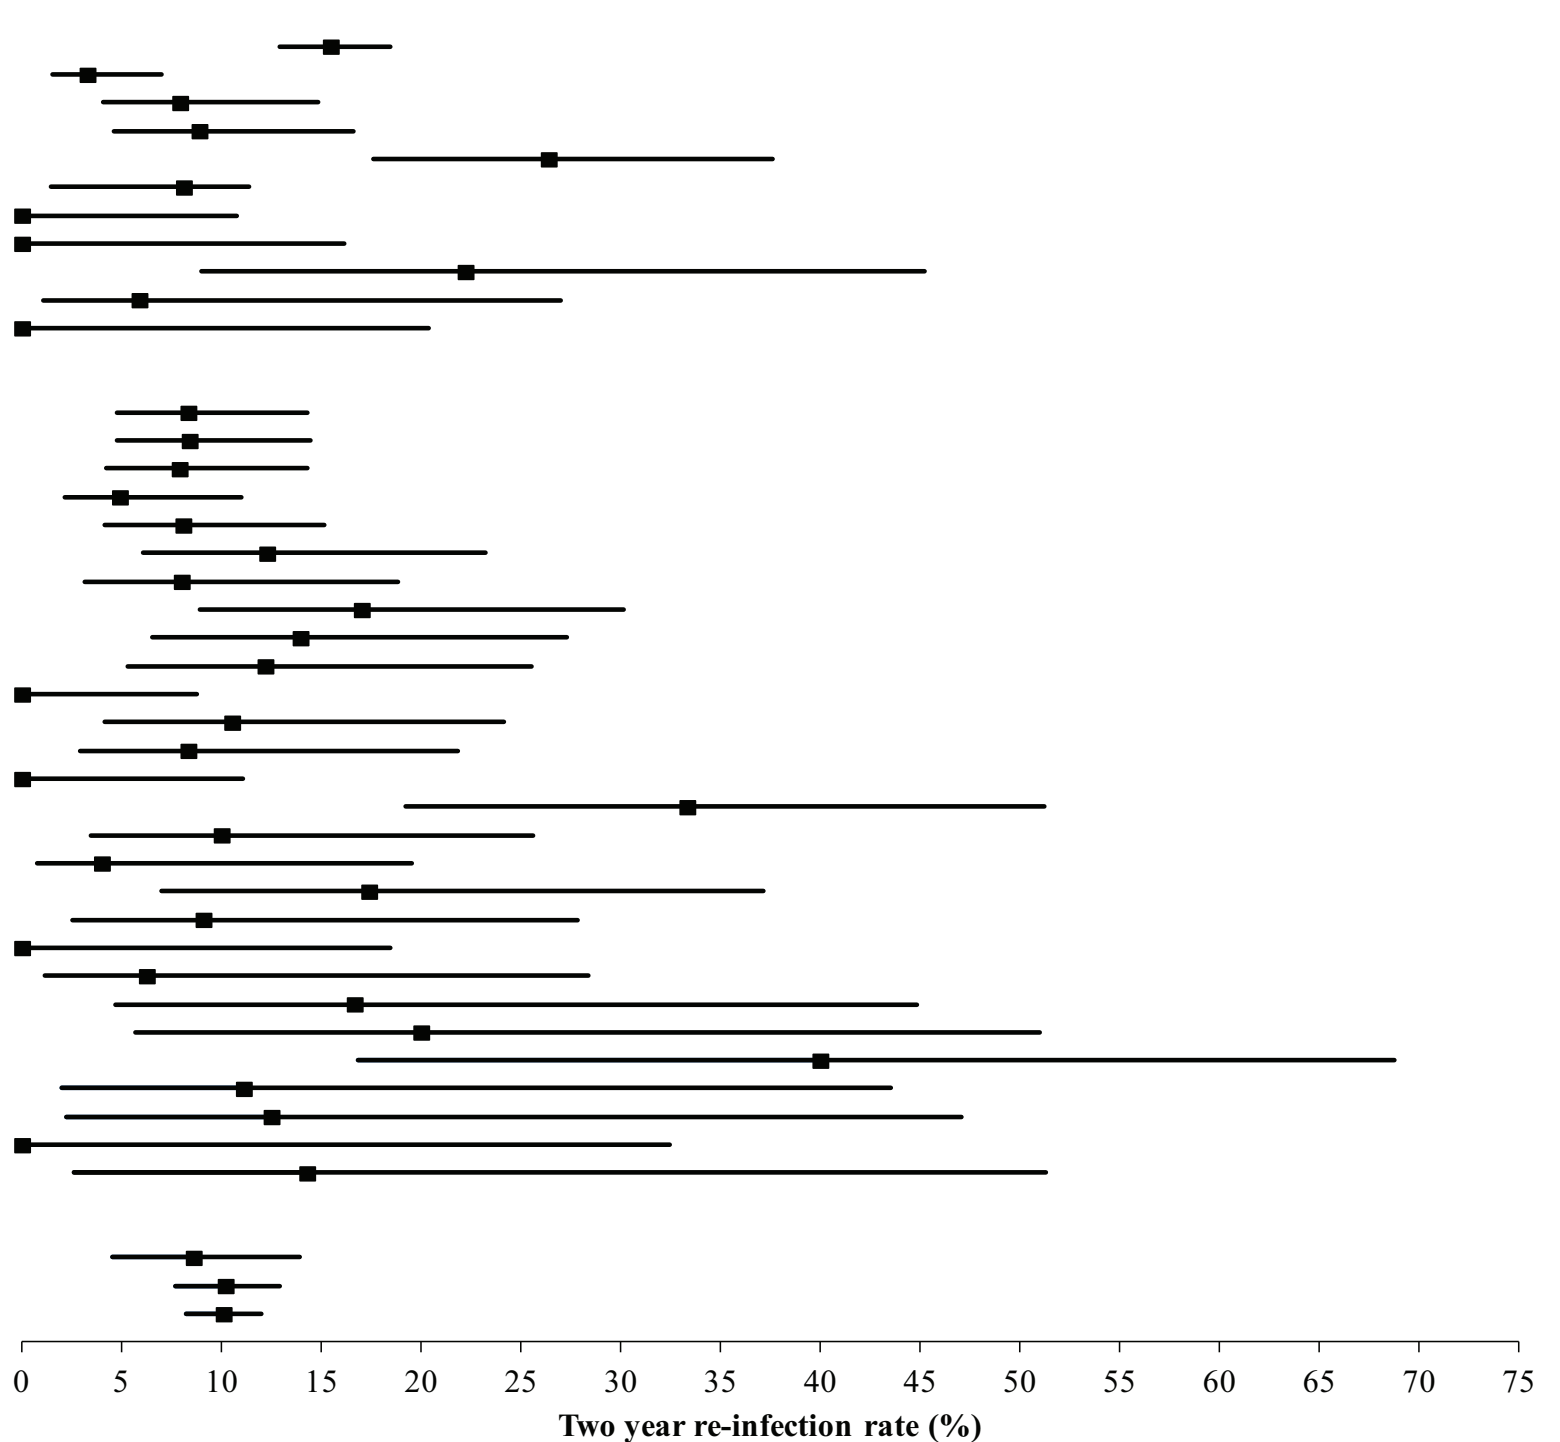

Supplement: MOESM2 [file 9598034]
